# Supplementary material for: Feasibility of a screening and prevention procedure for risks associated with dysphagia in older patients in geriatric units: the DYSPHAGING pilot study protocol
Source: PubMed Central journal article supplement (PMC11033636; doi:10.1136/bmjopen-2023-081333), 2024-04-19
Supplement: bmjopen-2023-081333supp003.pdf [file bmjopen-2023-081333supp003.pdf]

Supplementary Table 2: World Health Organization Trial Registration Data Set.

| Data category                                 | Information <sup>32</sup>                                                                                                                                                                |
|-----------------------------------------------|------------------------------------------------------------------------------------------------------------------------------------------------------------------------------------------|
| Primary registry and trial identifying number | ClinicalTrials.gov<br>NCT05734586                                                                                                                                                        |
| Date of registration in primary registry      | 8 February, 2023                                                                                                                                                                         |
| Secondary identifying numbers                 | 69HCL22_0474                                                                                                                                                                             |
| Source(s) of monetary or material support     | Hospices Civils de Lyon, France                                                                                                                                                          |
| Primary sponsor                               | Hospices Civils de Lyon, France                                                                                                                                                          |
| Secondary sponsor(s)                          | N/A                                                                                                                                                                                      |
| Contact for public queries                    | Marion MERDINIAN, MD<br>Tel: 00 33 4 78 86 56 83<br>E-mail: marion.merdinian@chu-lyon.fr                                                                                                 |
| Contact for scientific queries                | Claire FALANDRY, MD, PhD<br>Tel: 00 33 4 78 86 66 34<br>E-mail: claire.falandry@chu-lyon.fr                                                                                              |
| Public title                                  | Screening for Sarcopenic Dysphagia and the Implementation of Measures to Prevent Its Complications in Geriatric Patients [DYSPHAGING-PILOT]                                              |
| Scientific title                              | Feasibility Study of Screening for Sarcopenic Dysphagia and the Implementation of Measures to Prevent Its Complications in Geriatric or Institutionalized Patients Aged $\geq 70$ Years. |
| Countries of recruitment                      | France                                                                                                                                                                                   |

| Data category                             | Information <sup>32</sup>                                                                                                                                                                                                                                                                                                                                                                                                                                                                                                                                                                                                                                                                                                                                                                                                      |
|-------------------------------------------|--------------------------------------------------------------------------------------------------------------------------------------------------------------------------------------------------------------------------------------------------------------------------------------------------------------------------------------------------------------------------------------------------------------------------------------------------------------------------------------------------------------------------------------------------------------------------------------------------------------------------------------------------------------------------------------------------------------------------------------------------------------------------------------------------------------------------------|
| Health condition(s) or problem(s) studied | Swallowing Disorder, Sarcopenic Dysphagia                                                                                                                                                                                                                                                                                                                                                                                                                                                                                                                                                                                                                                                                                                                                                                                      |
| Intervention(s)                           | <p>Other: EAT-10 (Eating assessment Tool) screening questionnaire<br/>           After inclusion, issuance of the EAT-10 screening questionnaire for swallowing disorders by the healthcare team</p> <p>Procedure: Protective measures for the upper airways</p> <p>In the event of an EAT <math>\geq 2</math> score, immediate implementation or within three days by the healthcare team of protective measures for the upper airways in 3 sectors:<br/>           1: Postural maneuvers; 2: Hygienodietetic rules; 3: Food textures</p>                                                                                                                                                                                                                                                                                     |
| Key inclusion and exclusion criteria      | <p>Inclusion Criteria:</p> <ul style="list-style-type: none"> <li>• Patient aged <math>\geq 70</math> years,</li> <li>• Patient affiliated to a social security system,</li> <li>• Patient hospitalized in the health sector or in a medico-social institute,</li> <li>• Patient informed of the study (information leaflet provided) and having orally signified their consent to inclusion in the study.</li> </ul> <p>Exclusion Criteria:</p> <ul style="list-style-type: none"> <li>• Patient unable to feed orally,</li> <li>• Patient with an active pathology responsible for acute swallowing disorders (<math>&lt; 3</math> months) (neurodegenerative pathology with predominant motor impairment such as Charcot's disease, stroke, ENT disease).</li> <li>• Patient unable to answer the questionnaire.</li> </ul> |
| Study type                                | <p>Interventional<br/>           Allocation: N/A<br/>           Intervention model: parallel assignment<br/>           Masking: None (Open Label)<br/>           Primary purpose: Other<br/>           Phase II</p>                                                                                                                                                                                                                                                                                                                                                                                                                                                                                                                                                                                                            |
| Date of first enrolment                   | June 1 <sup>st</sup> ,2023                                                                                                                                                                                                                                                                                                                                                                                                                                                                                                                                                                                                                                                                                                                                                                                                     |
| Target sample size                        | 102                                                                                                                                                                                                                                                                                                                                                                                                                                                                                                                                                                                                                                                                                                                                                                                                                            |
| Recruitment status                        | Recruiting                                                                                                                                                                                                                                                                                                                                                                                                                                                                                                                                                                                                                                                                                                                                                                                                                     |
| Primary outcome(s)                        | <p>Proportion of complete achievement of steps 1 and 2 [Time Frame: Three days]<br/>           The judgment criterion is validated if</p> <ol style="list-style-type: none"> <li>1. Stage 1 is performed and the EAT-10 <math>&lt; 2</math> or if</li> <li>2. Stage 1 is performed with an EAT-10 <math>\geq 2</math> and stage 2 is performed within 3 days after stage 1.</li> </ol>                                                                                                                                                                                                                                                                                                                                                                                                                                         |

| Data category          | Information <sup>32</sup>                                                                                                                                                                                                                                                                                                                                                                                                                                                                                                                                                                                                                                                                                                                                                                                                                                                                                                                                                                                                                                                                                                                                                                                                                                                                                                                                                                                                                                                                                                                                                                                                                                                                                                                                                                                                                                                                                                  |
|------------------------|----------------------------------------------------------------------------------------------------------------------------------------------------------------------------------------------------------------------------------------------------------------------------------------------------------------------------------------------------------------------------------------------------------------------------------------------------------------------------------------------------------------------------------------------------------------------------------------------------------------------------------------------------------------------------------------------------------------------------------------------------------------------------------------------------------------------------------------------------------------------------------------------------------------------------------------------------------------------------------------------------------------------------------------------------------------------------------------------------------------------------------------------------------------------------------------------------------------------------------------------------------------------------------------------------------------------------------------------------------------------------------------------------------------------------------------------------------------------------------------------------------------------------------------------------------------------------------------------------------------------------------------------------------------------------------------------------------------------------------------------------------------------------------------------------------------------------------------------------------------------------------------------------------------------------|
| Key secondary outcomes | <ul style="list-style-type: none"> <li>• Percentage of eligible patients refusing to participate in the study [Time Frame: 18 months] <ul style="list-style-type: none"> <li>○ Number of eligible patients who refused to participate in the study</li> </ul> </li> <li>• Age, gender, comorbidities (CIRS-G), autonomy (ADL, IADL), co-medications [Time Frame: 19 months] <ul style="list-style-type: none"> <li>○ Patient characteristics will be collected at each site at the end of the study by a clinical research assistant based on their medical records.</li> </ul> </li> <li>• Rate of partial completion of the protocol [Time Frame: 19 months] <ul style="list-style-type: none"> <li>○ Proportion of non-performance of step 1 and/or step 2 within the time limit. Proportion of steps 2 carried out incompletely), description of the reasons</li> </ul> </li> <li>• Diagnosis of undernutrition and/or neurocognitive disorders and/or patent lung infection and/or COPD described in the patient's medical file, nutritional risk situation assessed by the Mini Nutritional Assessment® (MNA) [Time Frame: 19 months] <ul style="list-style-type: none"> <li>○ Patient characteristics will be collected at each site at the end of the study by a clinical research assistant based on their medical records.</li> </ul> </li> <li>• Composition and disciplines of the care team [Time Frame: 19 months] <ul style="list-style-type: none"> <li>○ At the end of the study, all data on the each allied health professionals will be collected on the dysphaging sheet</li> </ul> </li> <li>• Satisfaction of the care team (Likert scale). [Time Frame: 19 months] <ul style="list-style-type: none"> <li>○ At the end of the study, each allied health professionals who has been involved in the care of at least one patient will fill out a satisfaction questionnaire.</li> </ul> </li> </ul> |
